# Supplementary material
Source: PubMed Central journal article supplement (PMC3859457)
Supplement: NIHMS534800-supplement-Supplementary_Data.pdf [file NIHMS534800-supplement-Supplementary_Data.pdf]

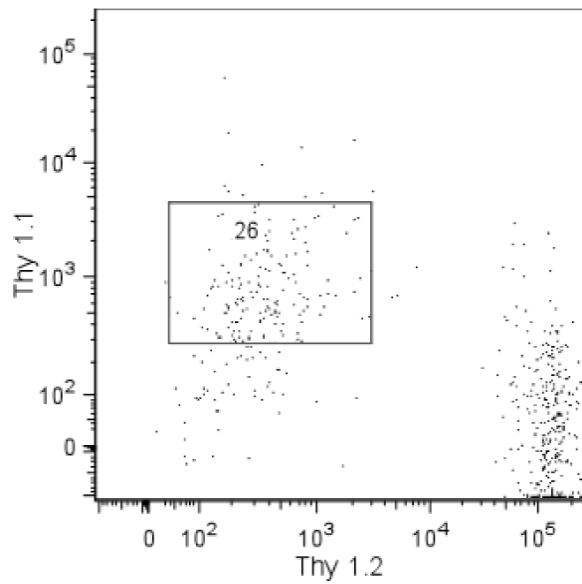

**Figure S1.** Flow cytometry of Thy1.1<sup>+</sup> OT-I Teff cells from gated CD8<sup>+</sup> lymphocytes from lungs of CC10-OVA mice (Thy1.2<sup>+</sup>) that were injected with 5.0x10<sup>5</sup> OT-I Teff cells (Thy1.1<sup>+</sup>) 2 weeks following the injection of a low-dose (1x10<sup>5</sup>) OT-I Teff cells (Thy1.2<sup>+</sup>). Lungs from 3 mice harvested and pooled 3 weeks after 2<sup>nd</sup> dose of Teff cells.

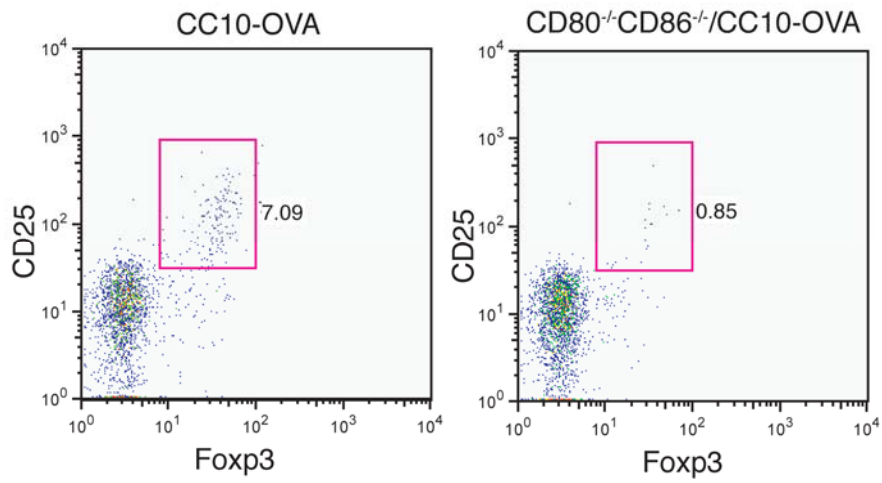

**Figure S2.** Representative flow cytometry of FOXP3<sup>+</sup>CD25<sup>+</sup> cells from gated CD4<sup>+</sup> lymphocytes from spleens of CC10-OVA and CD80<sup>-/-</sup>CD86<sup>-/-</sup>/CC10-OVA mice. CD80<sup>-/-</sup>CD86<sup>-/-</sup> mice show >8-fold decrease in Treg cells compared to wild-type mice.

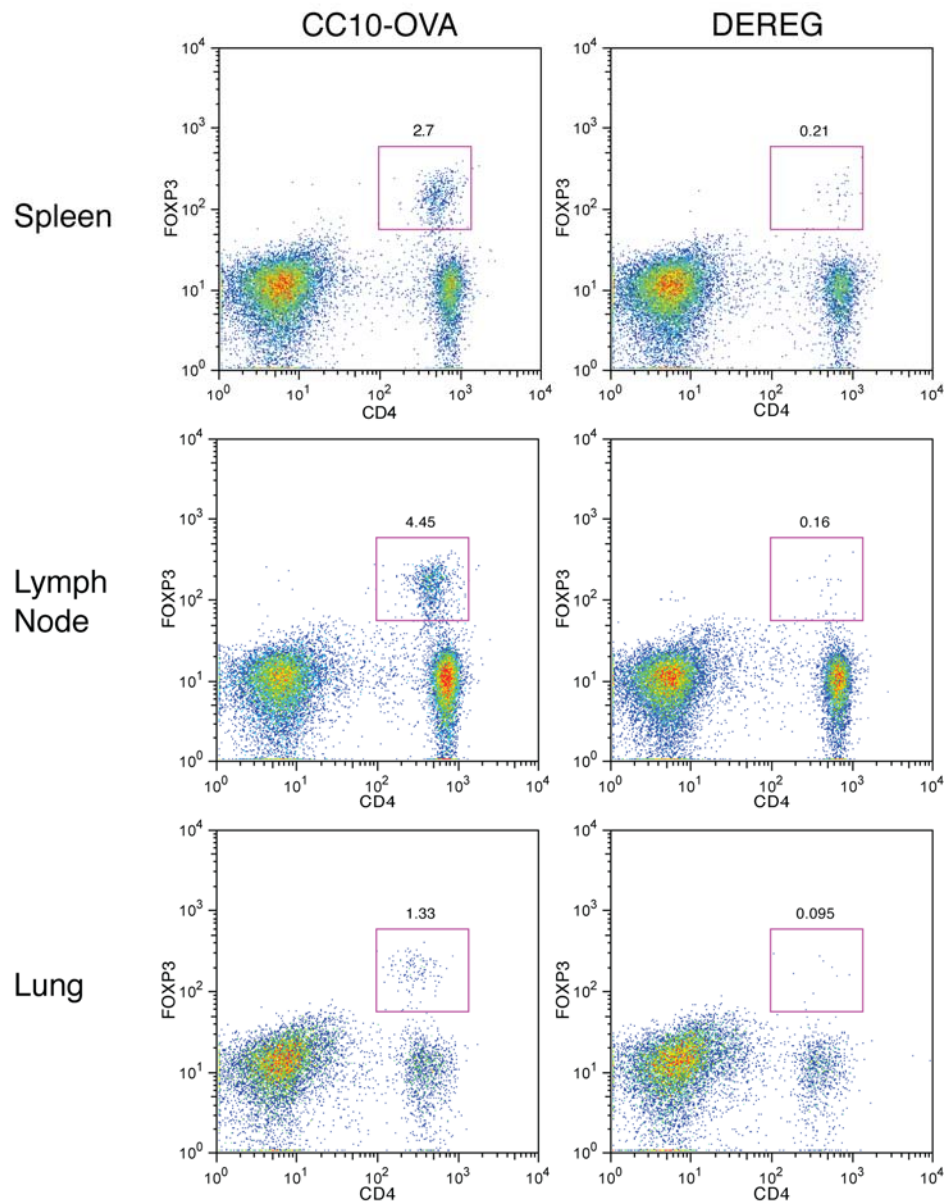

**Figure S3.** Representative flow cytometry of CD4<sup>+</sup>FOXP3<sup>+</sup> cells from spleen, inguinal lymph nodes, and lung of CC10-OVA and DT-treated DEREK littermates. DT treatment of DEREK mice decreased Tregs by >12-fold in various tissues compared to littermate CC10-OVA mice.
